# Supplementary material
Source: PubMed Central journal article supplement (PMC5655072)
Supplement: AAC.00416-17_zac011176604s1.pdf [file AAC.00416-17_zac011176604s1.pdf]

1 **Figure S1. Individual goodness-of-fit plot for final model**

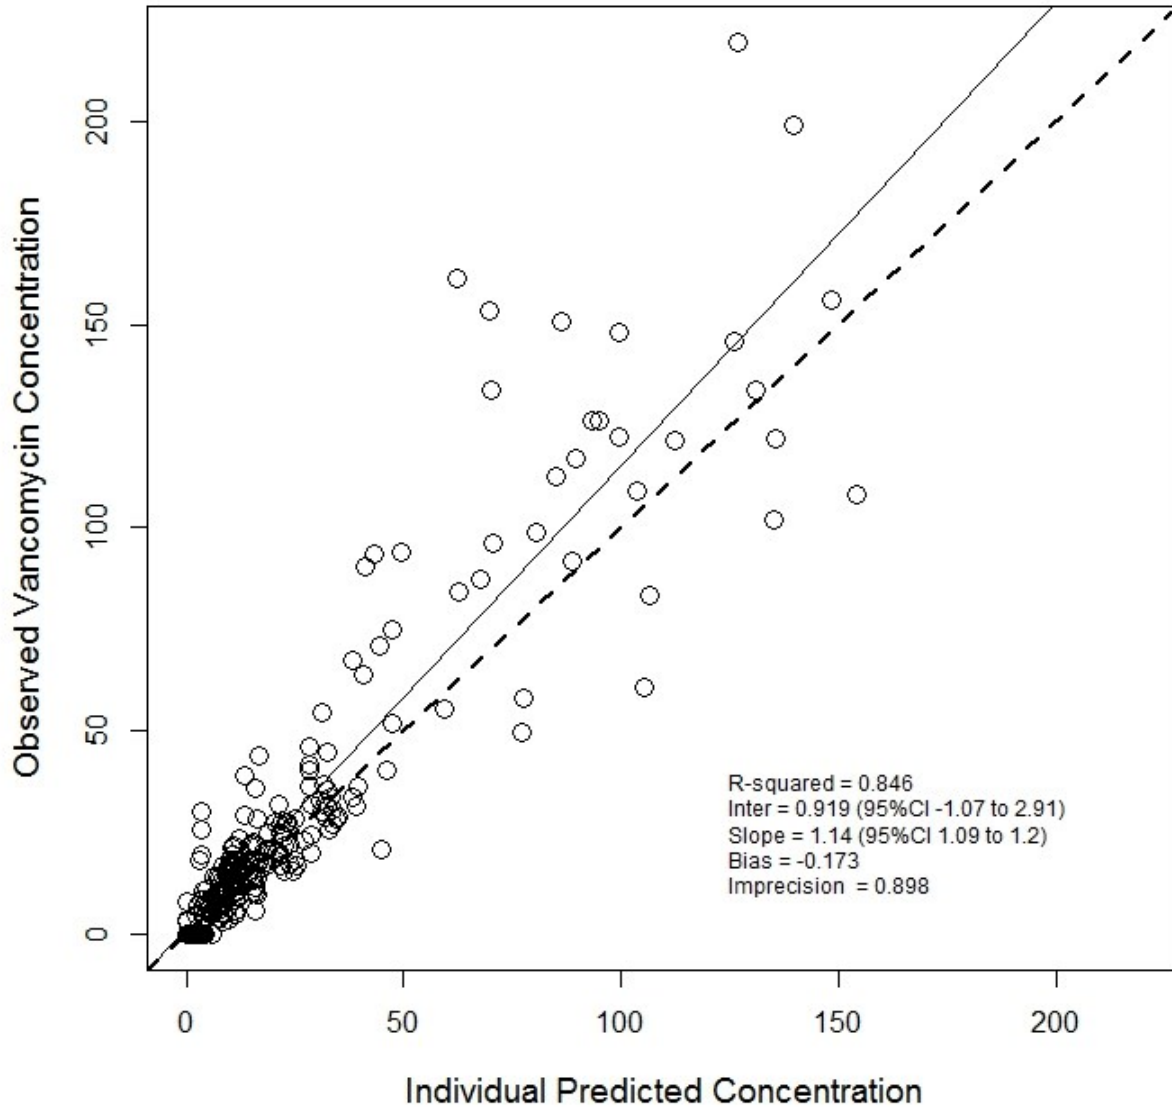

2

3

4 **Figure S2. Box plot of exposure variability based on total daily dose and dosing scheme**

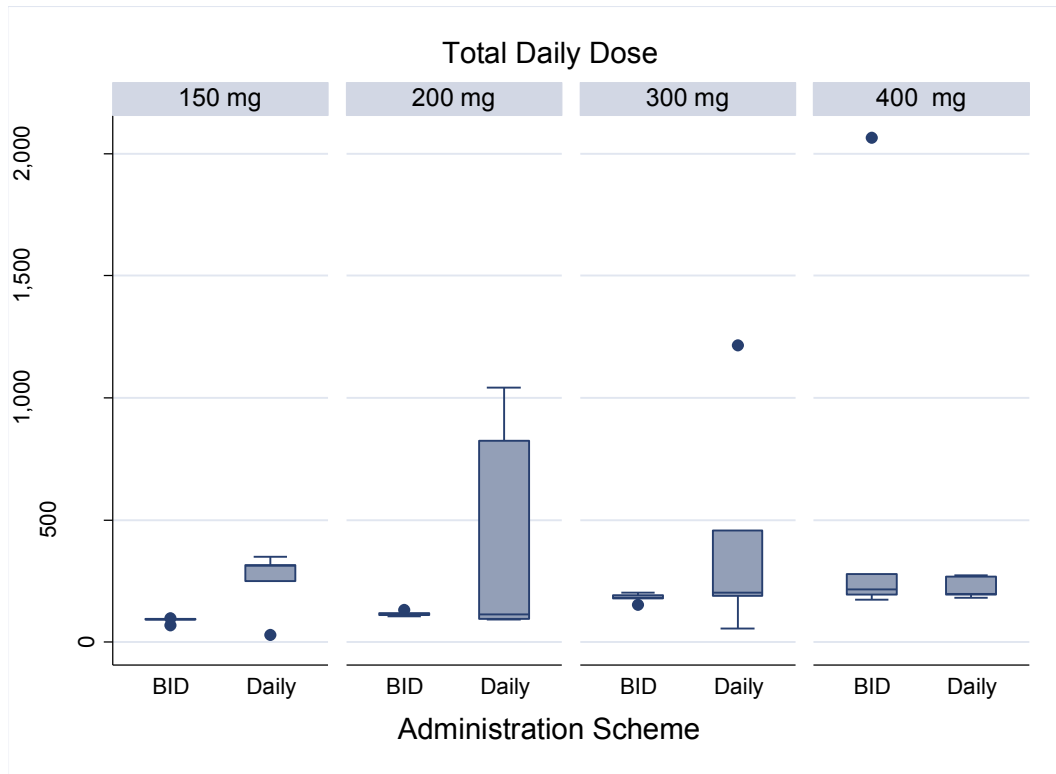

5

6

7 Abbreviations: AUC, area under the curve; BID, twice daily dosing

8

9 **Figure S3. Three-dimensional plot of relationship between vancomycin exposure metrics**  
10 **S3a. Logarithmic transformations**

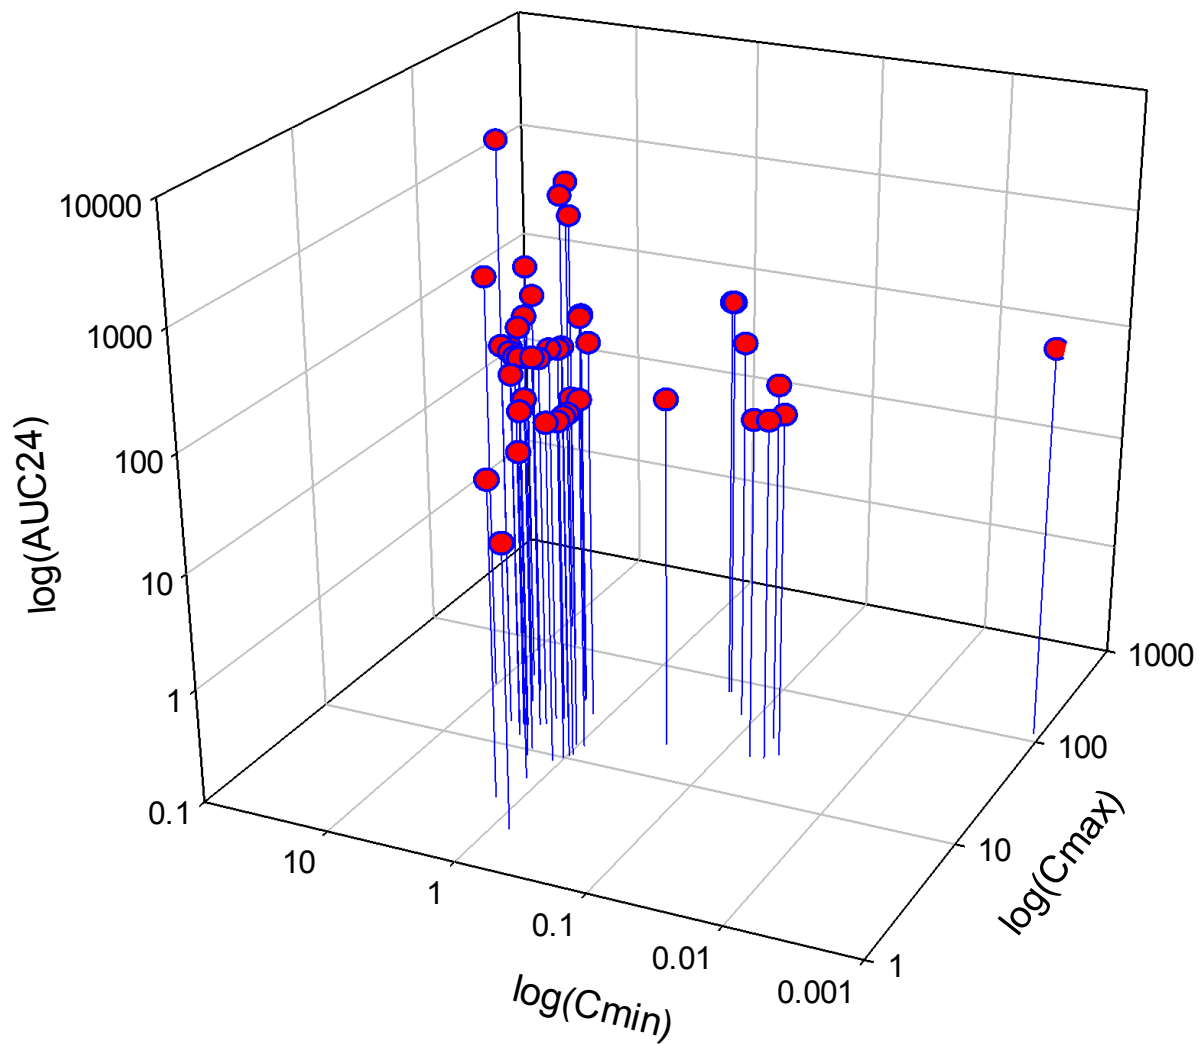

11  
12

13 **S3b. Non-logarithmic relationship of PK exposure metrics with fitted mesh**

3 way relationship of PK exposure metrics

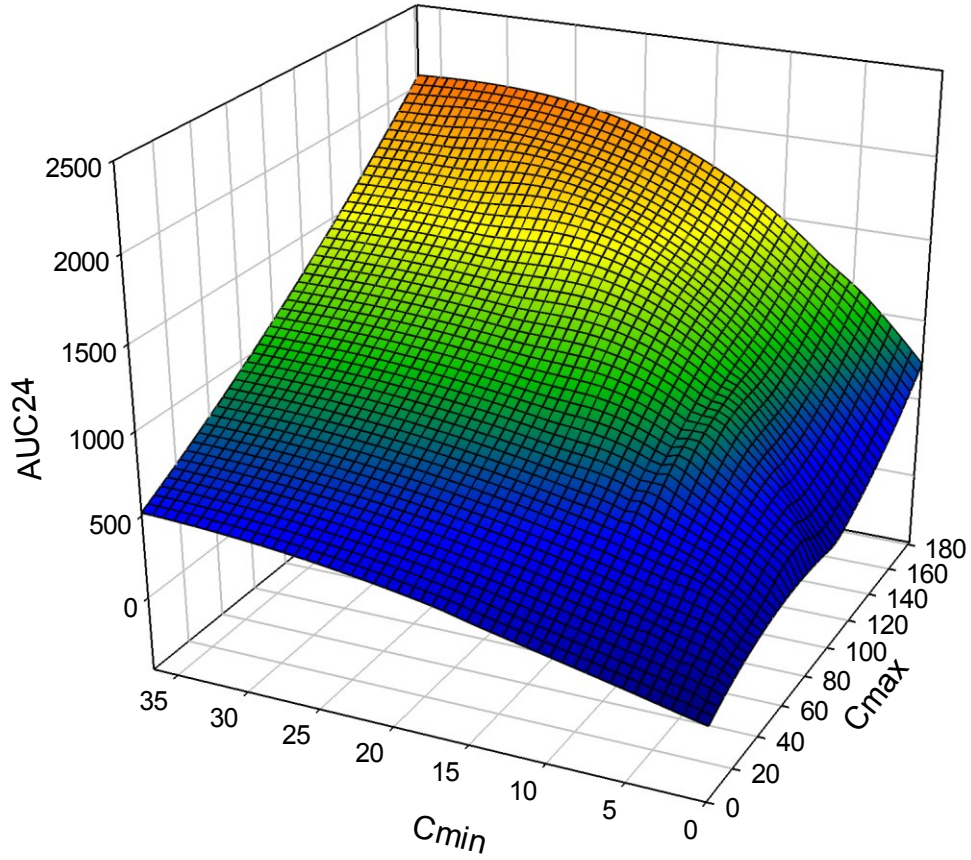

15 **Figure S4. Exposure-Response Relationship between KIM-1 (ng/mL) and (A) Cmax<sub>0-24h</sub> (B)**  
 16 **AUC<sub>0-24h</sub> and (C) Cmin<sub>0-24h</sub> in complete data (1) and with an outlier removed (2)**

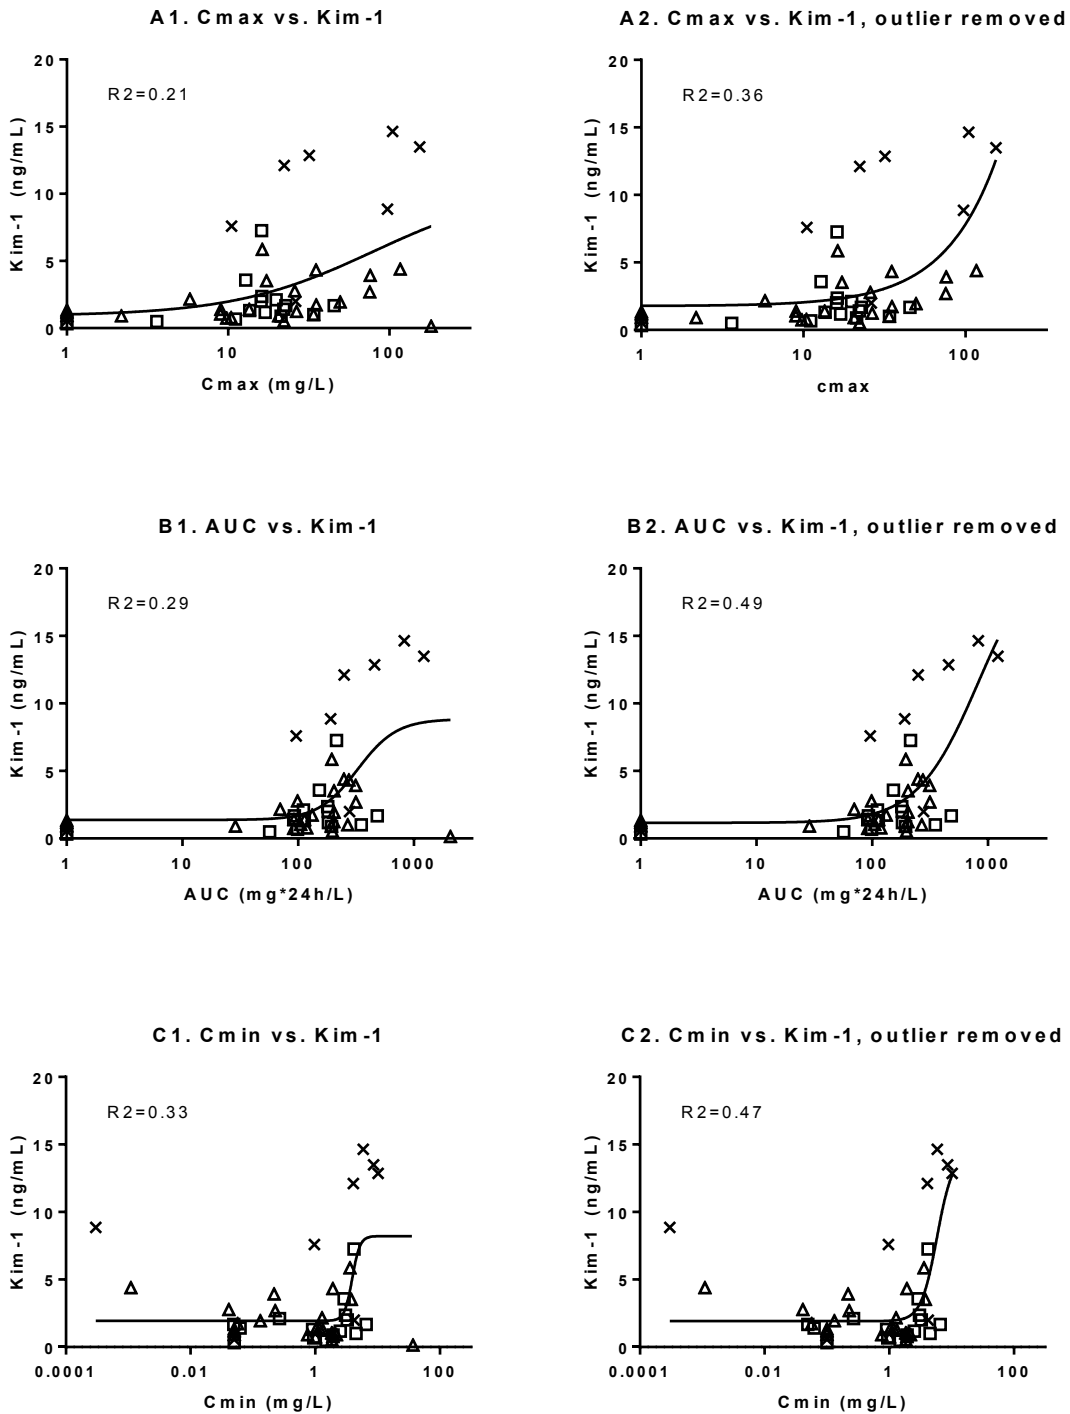

17

18 **Figure Legend:** Composite histopathology score: □, No histopathologic damage; Δ, Minimal  
 19 histopathologic damage; x, mild histopathologic damage

20 **Table S1. Covariance matrix of final pharmacokinetic model in the lower triangular form**

|                       | $K_e$ ( $h^{-1}$ ) | $V_0/F$ (L/0.28 kg) | $K_a$ ( $h^{-1}$ ) | $K_{12}$ ( $h^{-1}$ ) | $K_{21}$ ( $h^{-1}$ ) |
|-----------------------|--------------------|---------------------|--------------------|-----------------------|-----------------------|
| $K_e$ ( $h^{-1}$ )    | 0.022              |                     |                    |                       |                       |
| $V_0/F$ (L/0.28 kg)   | -0.177             | 4.753               |                    |                       |                       |
| $K_a$ ( $h^{-1}$ )    | -0.001             | -0.432              | 0.948              |                       |                       |
| $K_{12}$ ( $h^{-1}$ ) | -0.065             | 3.407               | -0.082             | 10.215                |                       |
| $K_{21}$ ( $h^{-1}$ ) | 0.069              | -4.246              | 0.084              | -11.862               | 13.976                |

21 Abbreviations:  $K_e$ , central compartment elimination constant;  $V_0/F$ , central compartment volume  
 22 standardized to 0.286 kg;  $K_a$ , absorption constant from peritoneum to central compartment;  $K_{12}$   
 23 and  $K_{21}$ , intercompartmental transfer rates

24

1 **Table S2. Bayesian posterior vancomycin exposure (median [IQR])**

|              | 150 mg/kg/day       |                  | 200 mg/kg/day      |                     | 300 mg/kg/day       |                     | 400 mg/kg/day       |                     |
|--------------|---------------------|------------------|--------------------|---------------------|---------------------|---------------------|---------------------|---------------------|
|              | 150 mg/kg daily     | 75 mg/kg BID     | 200 mg/kg daily    | 100 mg/kg BID       | 300 mg/kg daily     | 150 mg/kg BID       | 400 mg/kg daily     | 200 mg/kg BID       |
| AUC (mg*h/L) | 313.7 [248.5-314.4] | 91.6 [91.2-92.6] | 112.8 [96.1-824.6] | 113.4 [110.9-118.4] | 203.4 [190.5-455.9] | 181.6 [179.4-193.1] | 197.3 [193.9-267.3] | 214.3 [194.7-278.0] |
| Cmax (mg/L)  | 75.5 [34.0-76.2]    | 22.1 [9.8-22.8]  | 13.6 [10.5-104.6]  | 13.5 [10.5-19.9]    | 49.6 [31.9-97.4]    | 16.2 [16.0-20.6]    | 22.2 [21.3-33.9]    | 17.9 [16.3-26.2]    |
| Cmin (mg/L)  | 0.23 [0.22-0.75]    | 0.06 [0.05-1.0]  | 1.2 [0.94-6.53]    | 1.0 [0.27-1.83]     | 1.5 [0.13-8.6]      | 2.9 [2.2-3.0]       | 1.9 [1.9-1.9]       | 4.1 [3.6-4.2]       |
| Tmax (h)     | 0.12 [0.10-0.12]    | 0.15 [0.12-0.18] | 0.08 [0.08-0.12]   | 0.20 [0.20-0.20]    | 0.20 [0.20-0.20]    | 0.20 [0.20-0.20]    | 0.20 [0.20-0.20]    | 0.20 [0.03-0.20]    |

2

3

4

29 **Table S3. Toxicodynamic results by AUC bin**

|                                                     | <b>AUC 0</b>        | <b>AUC 1-100</b>    | <b>AUC 101-200</b>  | <b>AUC 201-300</b>  | <b>AUC &gt; 300</b> |
|-----------------------------------------------------|---------------------|---------------------|---------------------|---------------------|---------------------|
| <b>Animals (n)</b>                                  | 5                   | 10                  | 16                  | 9                   | 9                   |
| <b>KIM-1 (ng/mL), median (IQR)</b>                  | 0.927 [0.55-1.18]   | 1.4 [0.75-2.16]     | 1.39 [0.91-2.35]    | 3.53 [1.94-4.40]    | 3.30 [1.34-13.18]   |
| <b>Clusterin (ng/mL), median (IQR)</b>              | 449 [409-486]       | 547 [304-768]       | 450 [272-624]       | 506 [412-817]       | 944 [482-1228]      |
| <b>Osteopontin (ng/mL), median (IQR)</b>            | 0.062 [0.087-0.258] | 0.122 [0.087-0.258] | 0.116 [0.083-0.152] | 0.167 [0.111-0.317] | 0.340 [0.104-0.589] |
| <b>Cystatin-C (ng/mL), median (IQR)</b>             | 517 [434-560]       | 792 [370-1121]      | 402 [192-583]       | 416 [215-524]       | 495 [251-812]       |
| <b>NGAL (ng/mL), median (IQR)</b>                   | 634 [400-1114]      | 1728 [763-2619]     | 1247 [997-2890]     | 1613 [671-2246]     | 1252 [476-2646]     |
| <b>Composite Histopathology Score, median (IQR)</b> | 1 [1-1]             | 1 [0-1]             | 0.5 [0-1]           | 1 [1-1]             | 1 [1-2]             |
| <b>Proximal Tubular Damage Score, median (IQR)</b>  | 0 [0-0]             | 0 [0-1]             | 0 [0-0]             | 0 [0-1]             | 0 [0-1]             |

30

31



32 **Table S4. Toxicodynamic results by Cmax bin**

|                                                     | <b>Cmax 0</b>       | <b>Cmax 1-15</b>    | <b>Cmax 16-30</b>   | <b>Cmax 31-60</b>   | <b>Cmax &gt; 60</b> |
|-----------------------------------------------------|---------------------|---------------------|---------------------|---------------------|---------------------|
| <b>Animals (n)</b>                                  | 5                   | 12                  | 17                  | 7                   | 8                   |
| <b>KIM-1 (ng/mL), median (IQR)</b>                  | 0.927 [0.55-1.18]   | 1.17 [0.76-1.77]    | 2.00 [1.21-3.16]    | 1.72 [1.01-4.33]    | 4.40 [2.69-13.49]   |
| <b>Clusterin (ng/mL), median (IQR)</b>              | 449 [409-486]       | 465 [383-684]       | 431 [383-684]       | 652 [382-1175]      | 874 [583-1015]      |
| <b>Osteopontin (ng/mL), median (IQR)</b>            | 0.062 [0.087-0.258] | 0.114 [0.085-0.123] | 0.138 [0.101-0.268] | 0.317 [0.094-0.625] | 0.140 [0.097-0.540] |
| <b>Cystatin-C (ng/mL), median (IQR)</b>             | 517 [434-560]       | 524 [361-798]       | 433 [242-676]       | 448 [215-802]       | 416 [217-562]       |
| <b>NGAL (ng/mL), median (IQR)</b>                   | 634 [400-1114]      | 1000 [686-1943]     | 2497 [1649-2813]    | 997 [517-2918]      | 762 [274-1600]      |
| <b>Composite Histopathology Score, median (IQR)</b> | 1 [1-1]             | 1 [0-1]             | 0 [0-1]             | 1 [0-1]             | 1.5 [1-2]           |
| <b>Proximal Tubular Damage Score, median (IQR)</b>  | 0 [0-0]             | 0 [0-0.5]           | 0 [0-0]             | 0 [0-1]             | 0.5 [0-1.5]         |
